# Supplementary material for: Effects of Different β-Lactam Antibiotics on Indirect Tomato (Solanum lycopersicum L.) Shoot Organogenesis and Agrobacterium tumefaciens Growth Inhibition In Vitro
Source: MDPI journal article supplement (doi:10.3390/antibiotics10060660), 2021-05-31
Supplement: s1 [file s1]

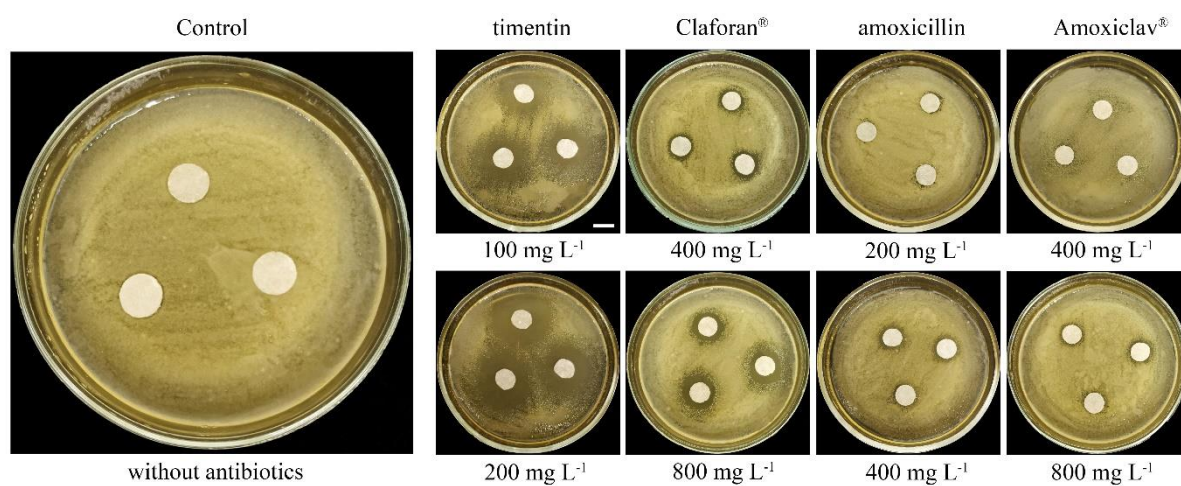

**Figure S1.** Antibacterial activity of different  $\beta$ -lactam antibiotics on growth inhibition of *A. tumefaciens* strain AGL0 using agar disk-diffusion assay.
