# Supplementary material for: Effects of Different β-Lactam Antibiotics on Indirect Tomato (Solanum lycopersicum L.) Shoot Organogenesis and Agrobacterium tumefaciens Growth Inhibition In Vitro
Source: MDPI journal article supplement (doi:10.3390/antibiotics10060660), 2021-05-31
Supplement: s1 [file s1]

**Table S1.** The results of three-way ANOVA test to evaluate the significance of culture medium components, tomato genotype and explant type on the callus formation frequency.

| Source of variation | ss       | df  | ms      | $F_{05}$ | $F$    |
|---------------------|----------|-----|---------|----------|--------|
| Total               | 35652.04 | 107 | —       | —        | —      |
| Variants            | 24319.19 | 35  | 694.83  | 1.53     | 4.41*  |
| Factors             |          |     |         |          |        |
| A (culture medium)  | 8382.13  | 8   | 1047.77 | 2.02     | 6.66*  |
| B (explant)         | 1789.50  | 1   | 1789.50 | 1.93     | 11.37* |
| C (genotype)        | 138.31   | 1   | 138.31  | 1.93     | 0.88   |
| Interactions        |          |     |         |          |        |
| AB                  | 3911.10  | 8   | 488.89  | 2.02     | 3.11*  |
| AC                  | 2691.08  | 8   | 336.38  | 2.02     | 2.14*  |
| BC                  | 785.24   | 1   | 785.24  | 1.93     | 4.99*  |
| ABC                 | 6621.83  | 8   | 827.73  | 2.02     | 5.26*  |
| Error               | 11332.86 | 72  | 157.40  | —        | —      |

Abbreviations: ss – sum of squares, df –degrees of freedom, ms – mean square,  $F_{05}$  – critical F value at 5% significance level ( $\alpha = 0.05$ ), F – F value, \* – F test significant at  $\alpha = 0.05$ .
